# Supplementary material for: Bioactive Phenolic and Isocoumarin Glycosides from the Stems of Homalium paniculiflorum
Source: MDPI journal article supplement (doi:10.3390/molecules23020472), 2018-02-22
Supplement: s1 [file s1]

# Supporting Information

## Bioactive Phenolic and Isocoumarin Glycosides from the Stems of *Homalium paniculiflorum*

Shou-Yuan Wu <sup>1,†</sup>, Yan-Hui Fu <sup>1,†</sup>, Qi Zhou <sup>1</sup>, Meng Bai <sup>1</sup>, Guang-Ying Chen <sup>1</sup>, Si-Yu Zhao <sup>1</sup>,  
Chang-Ri Han <sup>2,\*</sup> and Xiao-Ping Song <sup>1,\*</sup>

<sup>1</sup> Key Laboratory of Tropical Medicinal Plant Chemistry of Ministry of Education, Hainan Normal University, Haikou 571158, China; wushouyuan2012@163.com (S.-Y.W.); fuyanhui80@163.com (Y-H.F.); zhouqi0313@163.com (Q.Z.); XXbai2014@163.com (M.B.); chgying123@163.com (G.-Y.C.); 13876740482@163.com (S.-Y.Z.); sxp628@126.com (X.-P.S.)

<sup>2</sup> Key Laboratory of Medicinal and Edible Plants Resources of Hainan Province, Hainan Institute of Science and Technology, HaiKou, 571126, China; hchr116@126.com (C.-R.H.)

\* Correspondence: sxp628@126.com; hchr116@126.com; Tel./Fax: +86-898-65889422

† These authors contributed equally to this work.

## Contents of Supporting Information

**Figure S1.**  $^1\text{H}$  NMR spectrum of compound **1** in  $\text{CD}_3\text{OD}$ .

**Figure S2.**  $^{13}\text{C}$  NMR spectrum of compound **1** in  $\text{CD}_3\text{OD}$ .

**Figure S3.** HSQC spectrum of compound **1** in  $\text{CD}_3\text{OD}$ .

**Figure S4.** HMBC spectrum of compound **1** in  $\text{CD}_3\text{OD}$ .

**Figure S5.**  $^1\text{H}$ - $^1\text{H}$  COSY spectrum of compound **1** in  $\text{CD}_3\text{OD}$ .

**Figure S6.**  $^1\text{H}$  NMR spectrum of compound **2** in  $\text{CD}_3\text{OD}$ .

**Figure S7.**  $^{13}\text{C}$  NMR spectrum of compound **2** in  $\text{CD}_3\text{OD}$ .

**Figure S8.** HSQC spectrum of compound **2** in  $\text{CD}_3\text{OD}$ .

**Figure S9.** HMBC spectrum of compound **2** in  $\text{CD}_3\text{OD}$ .

**Figure S10.**  $^1\text{H}$ - $^1\text{H}$  COSY spectrum of compound **2** in  $\text{CD}_3\text{OD}$ .

**Figure S11.**  $^1\text{H}$  NMR spectrum of compound **3** in  $\text{DMSO-}d_6$ .

**Figure S12.**  $^{13}\text{C}$  NMR spectrum of compound **3** in  $\text{DMSO-}d_6$ .

**Figure S13.** HSQC spectrum of compound **3** in  $\text{DMSO-}d_6$ .

**Figure S14.** HMBC spectrum of compound **3** in  $\text{DMSO-}d_6$ .

**Figure S15.**  $^1\text{H}$ - $^1\text{H}$  COSY spectrum of compound **3** in  $\text{DMSO-}d_6$ .

**Figure S16.**  $^1\text{H}$  NMR spectrum of compound **4** in  $\text{DMSO-}d_6$ .

**Figure S17.**  $^{13}\text{C}$  NMR spectrum of compound **4** in  $\text{DMSO-}d_6$ .

**Figure S18.** HSQC spectrum of compound **4** in  $\text{DMSO-}d_6$ .

**Figure S19.** HMBC spectrum of compound **4** in  $\text{DMSO-}d_6$ .

**Figure S20.**  $^1\text{H}$ - $^1\text{H}$  COSY spectrum of compound **4** in  $\text{DMSO-}d_6$ .

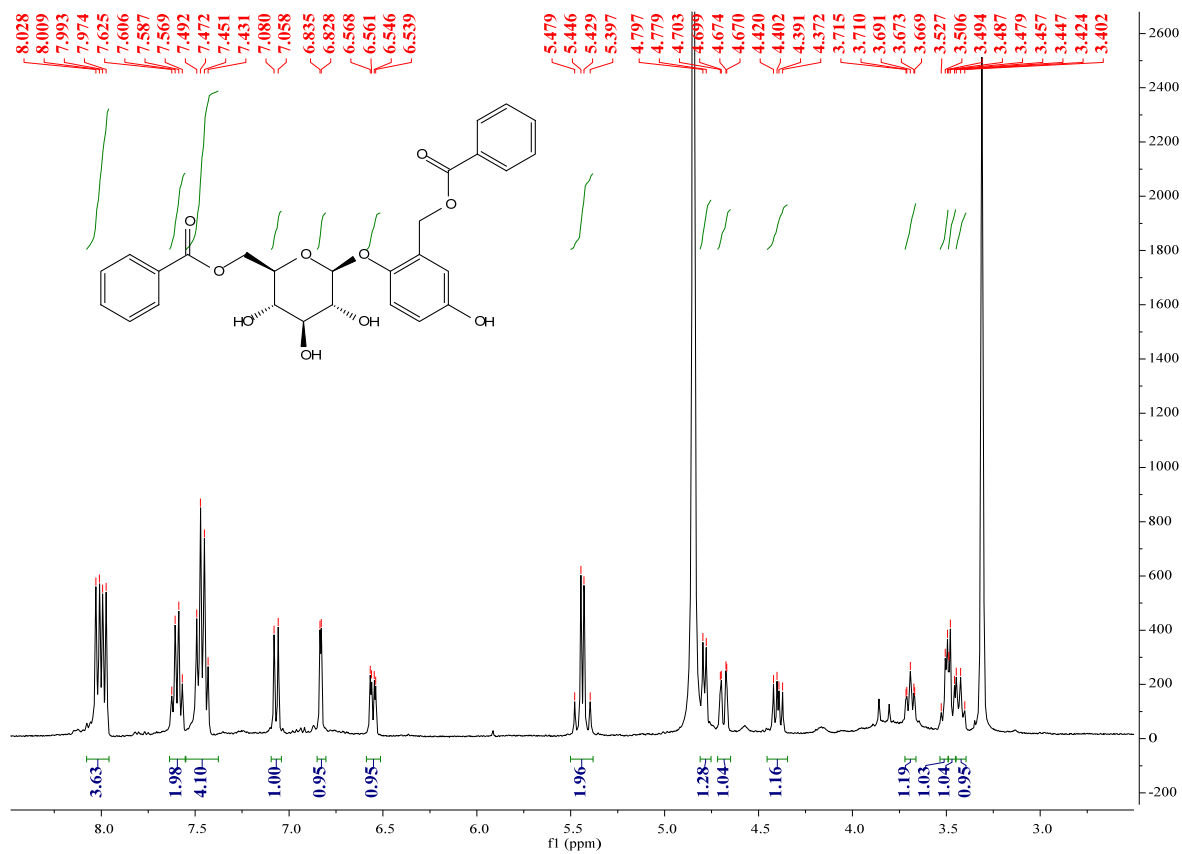

**Figure S1.** <sup>1</sup>H NMR spectrum of compound **1** in CD<sub>3</sub>OD.

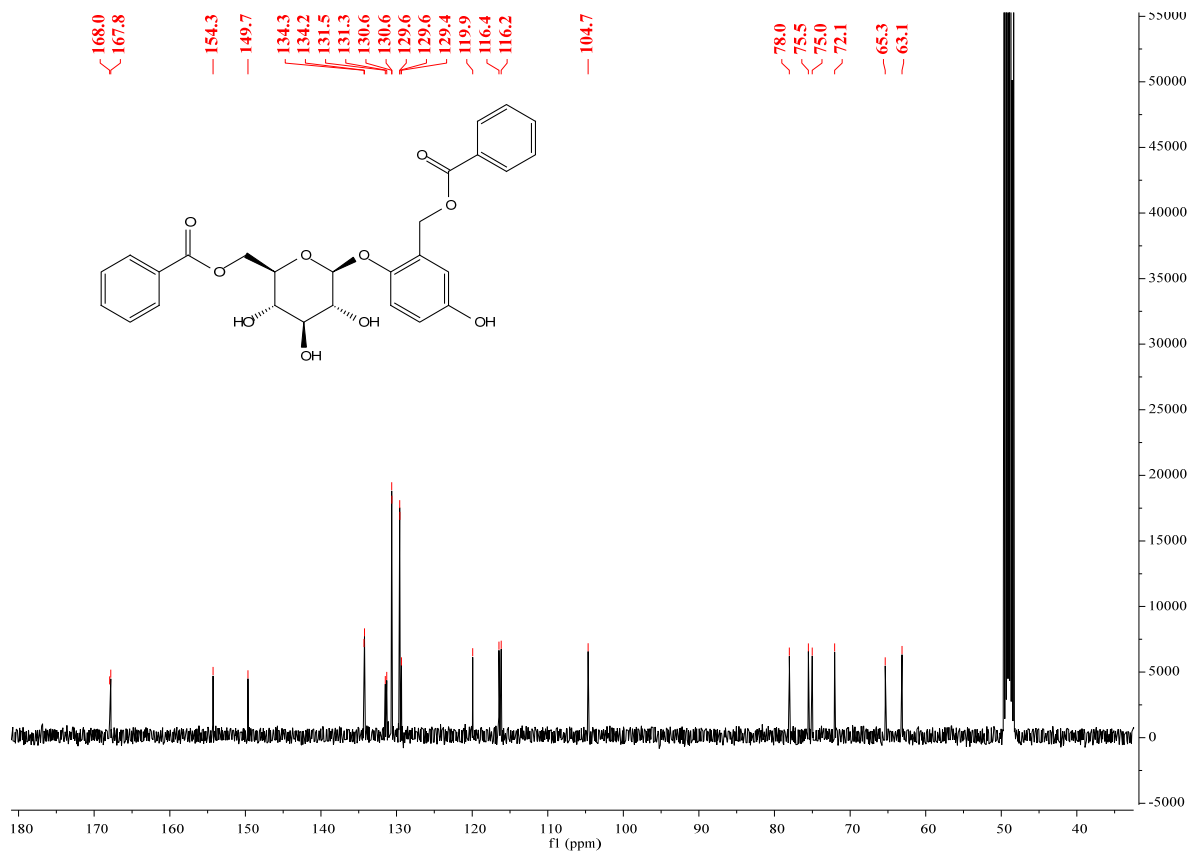

**Figure S2.** <sup>13</sup>C NMR spectrum of compound **1** in CD<sub>3</sub>OD.

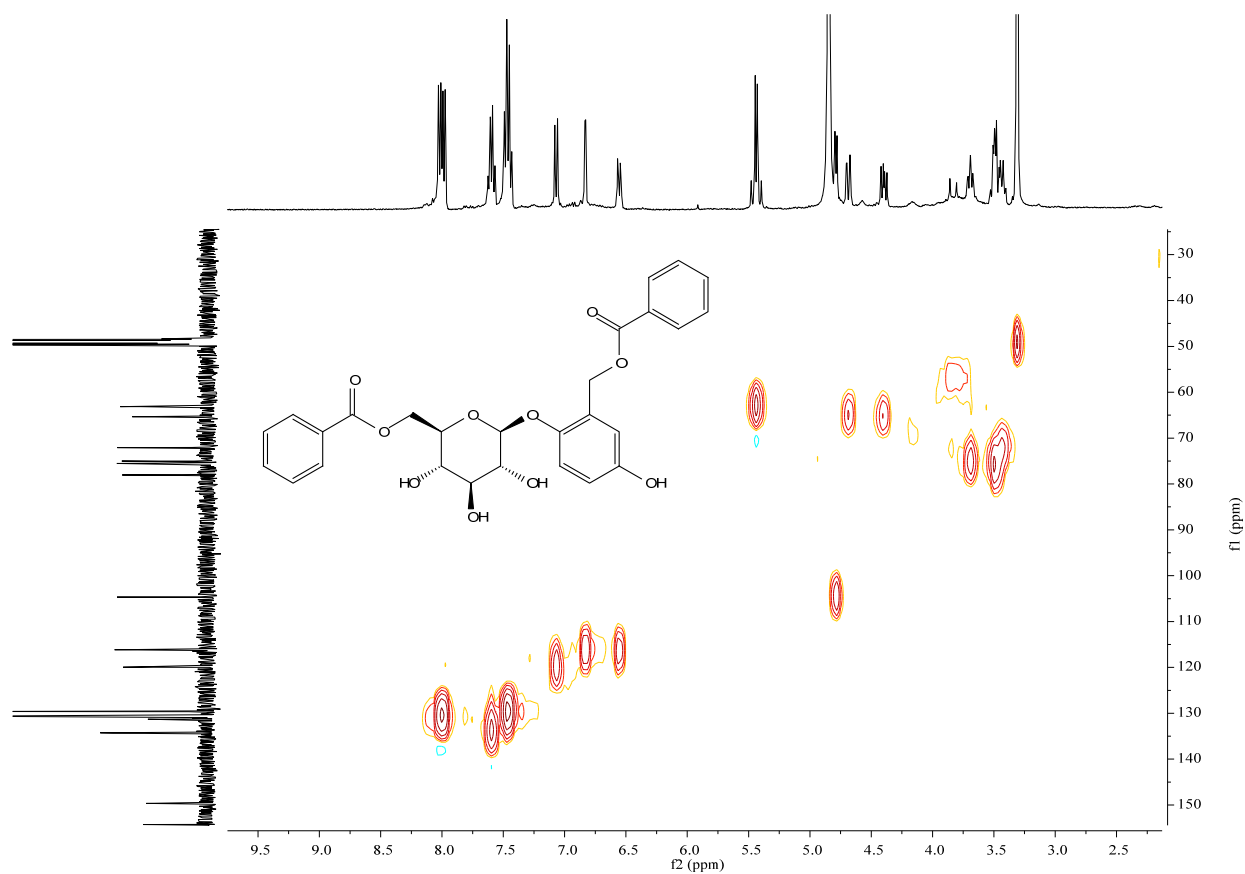

Figure S3. HSQC spectrum of compound 1 in CD<sub>3</sub>OD.

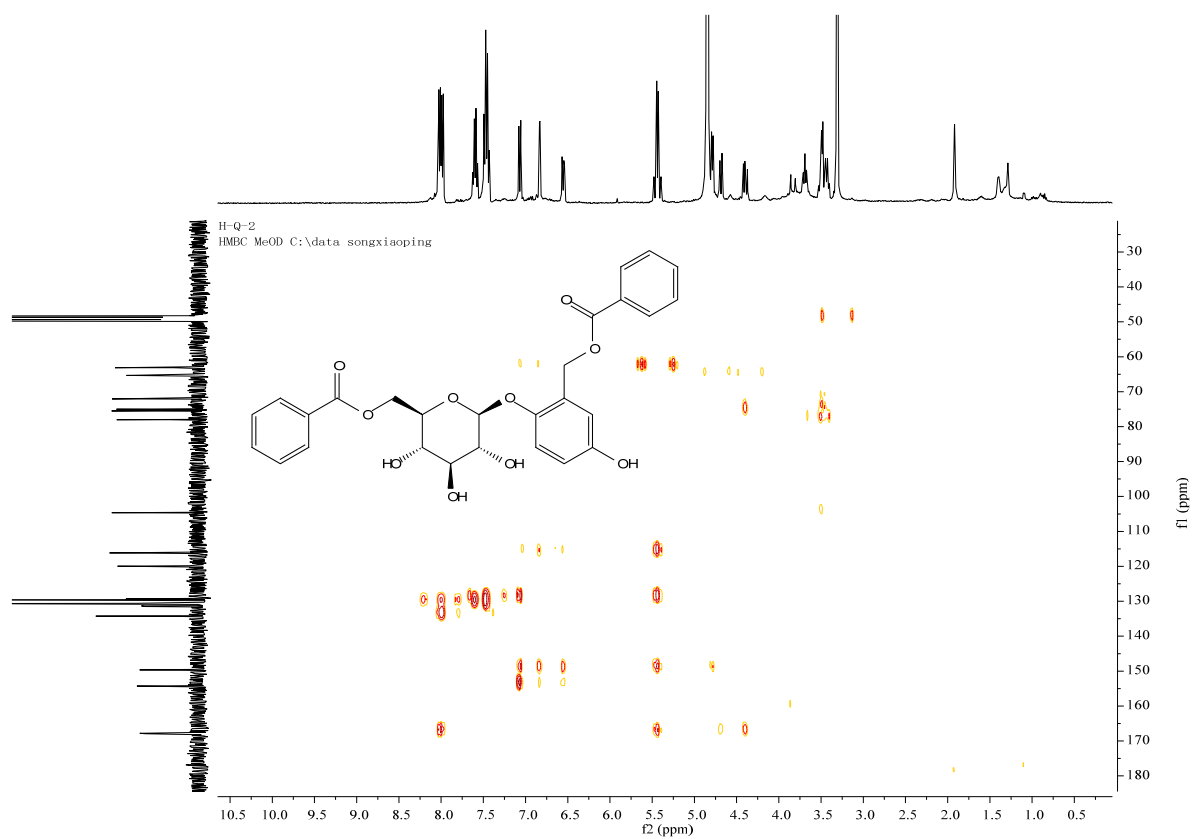

Figure S4. HMBC spectrum of compound 1 in CD<sub>3</sub>OD.

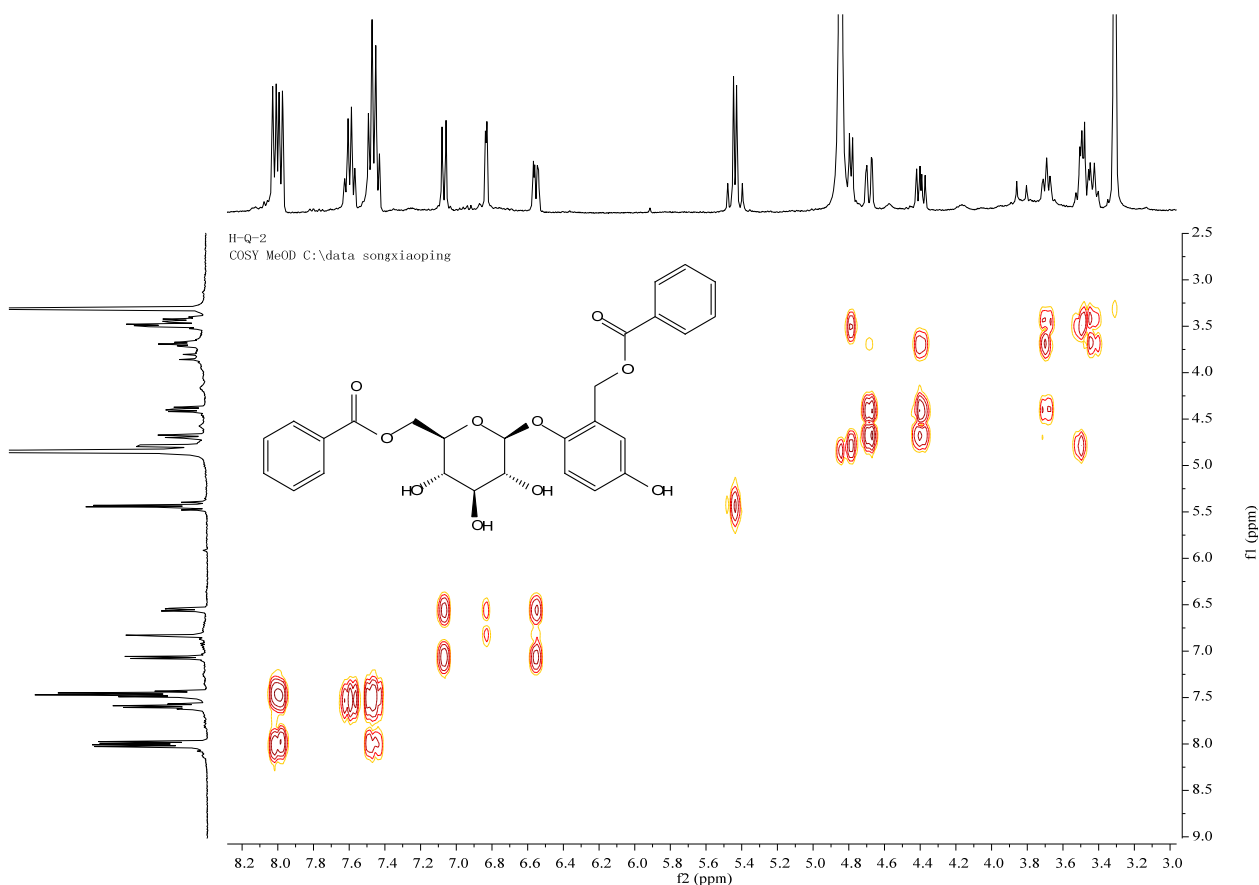

Figure S5.  $^1\text{H}$ - $^1\text{H}$  COSY spectrum of compound **1** in  $\text{CD}_3\text{OD}$ .

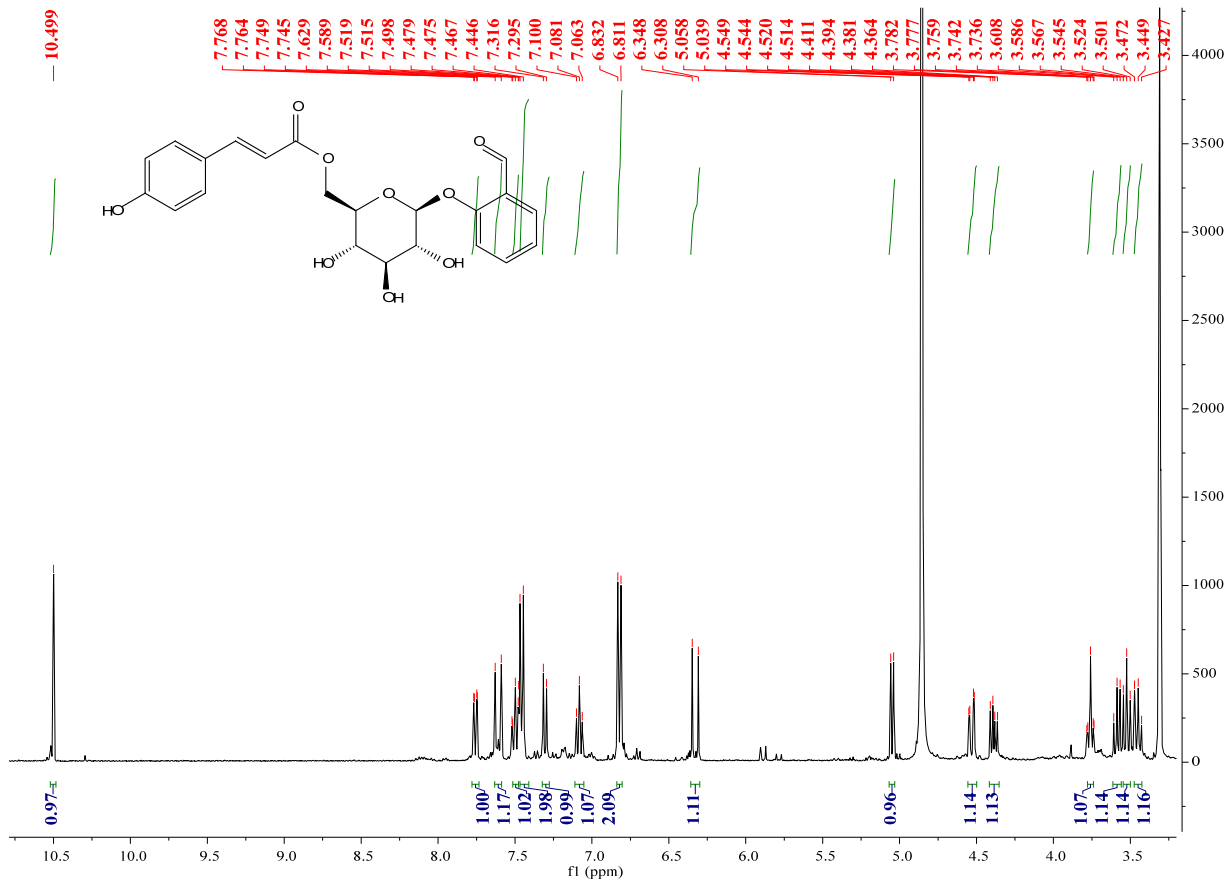

Figure S6.  $^1\text{H}$  NMR spectrum of compound **2** in  $\text{CD}_3\text{OD}$ .

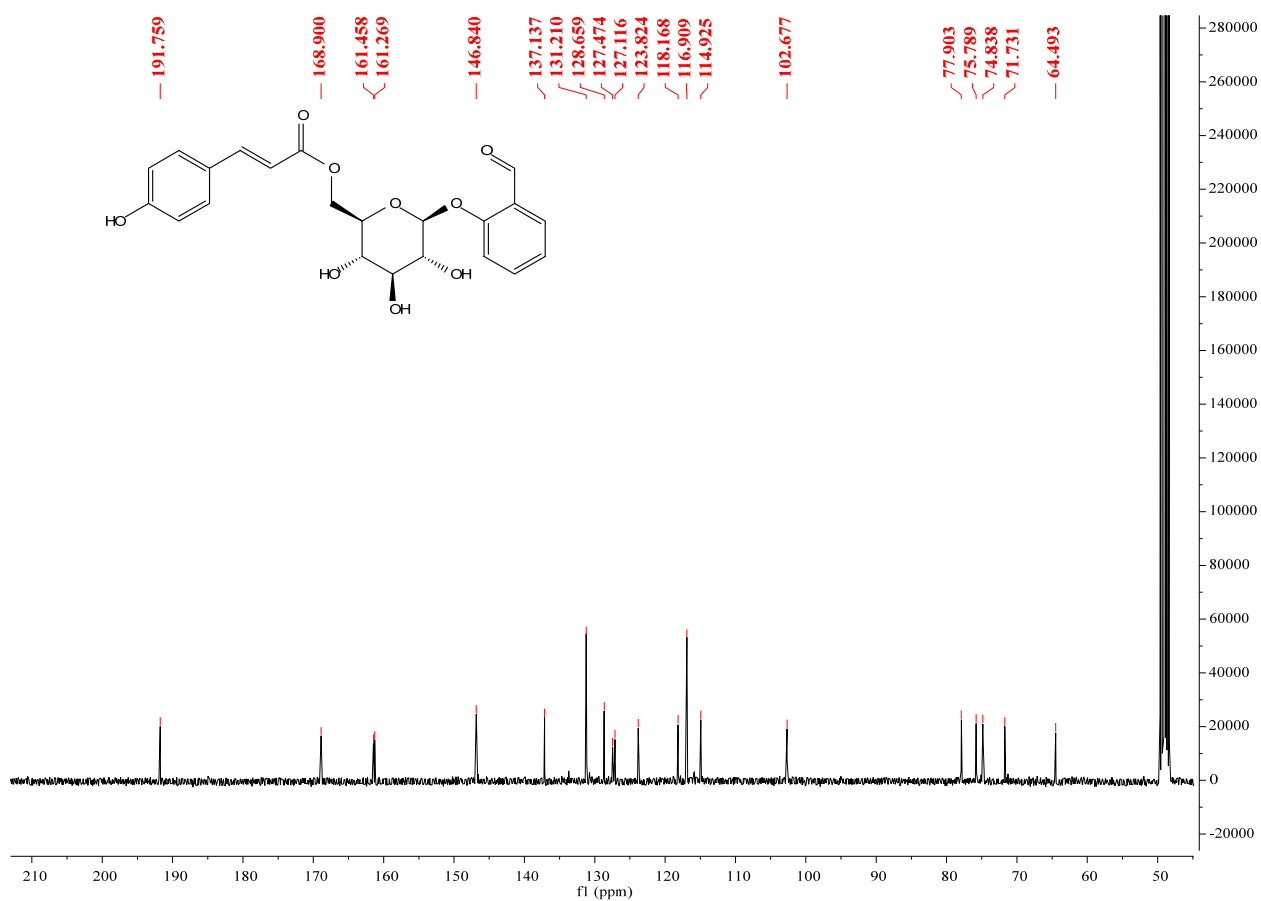

Figure S7. <sup>13</sup>C NMR spectrum of compound 2 in CD<sub>3</sub>OD.

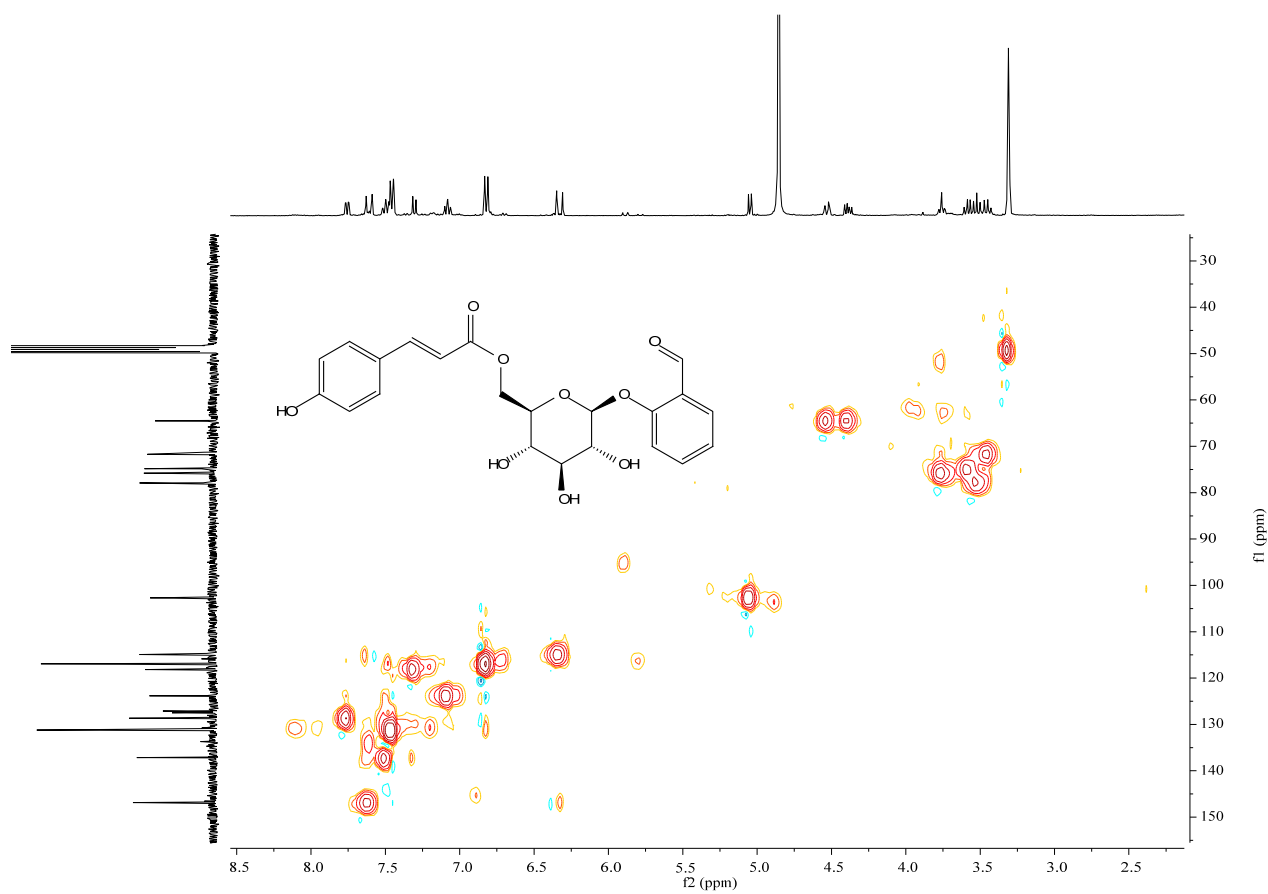

Figure S8. HSQC spectrum of compound 2 in CD<sub>3</sub>OD.

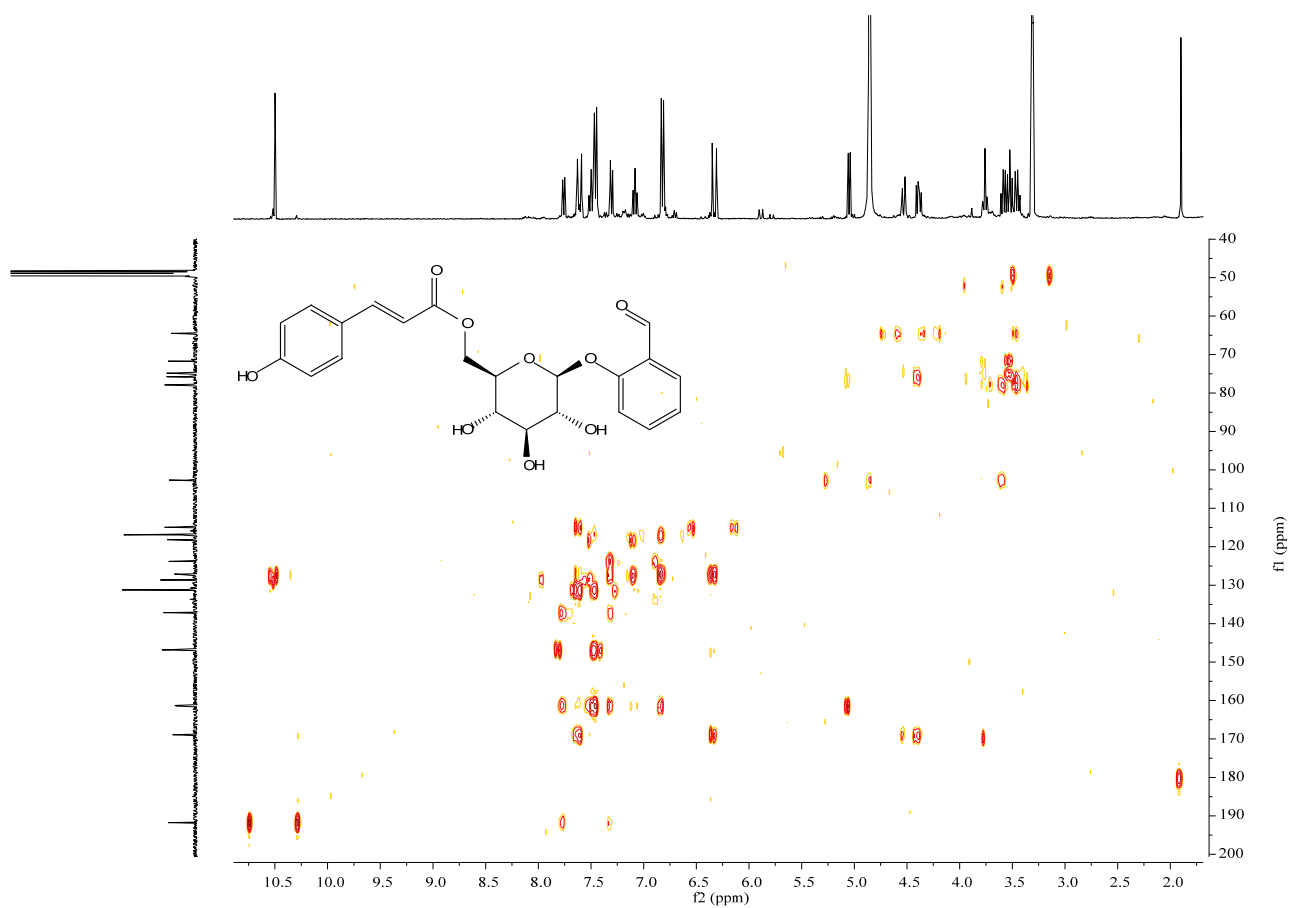

**Figure S9.** HMBC spectrum of compound **2** in CD<sub>3</sub>OD.

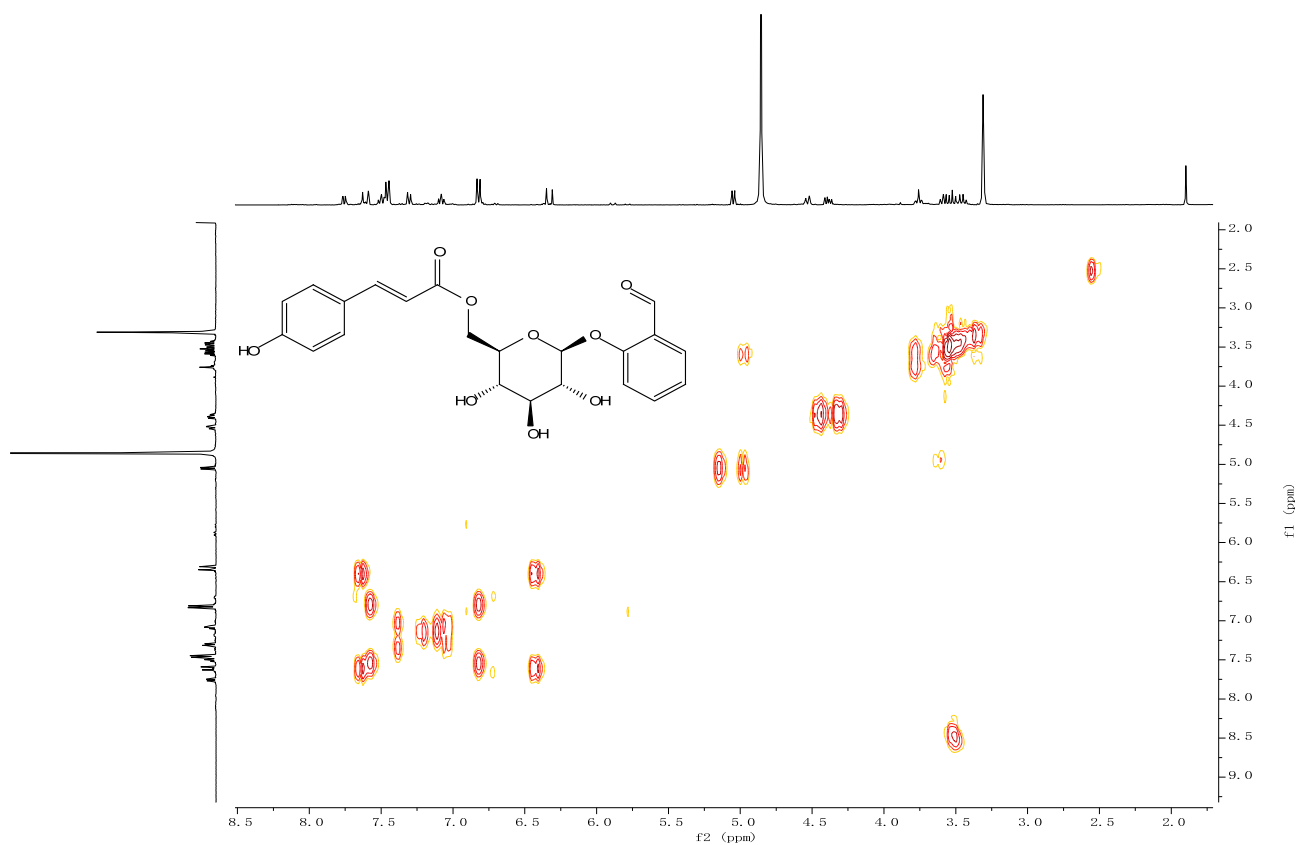

**Figure S10.** <sup>1</sup>H-<sup>1</sup>H COSY spectrum of compound **2** in CD<sub>3</sub>OD.

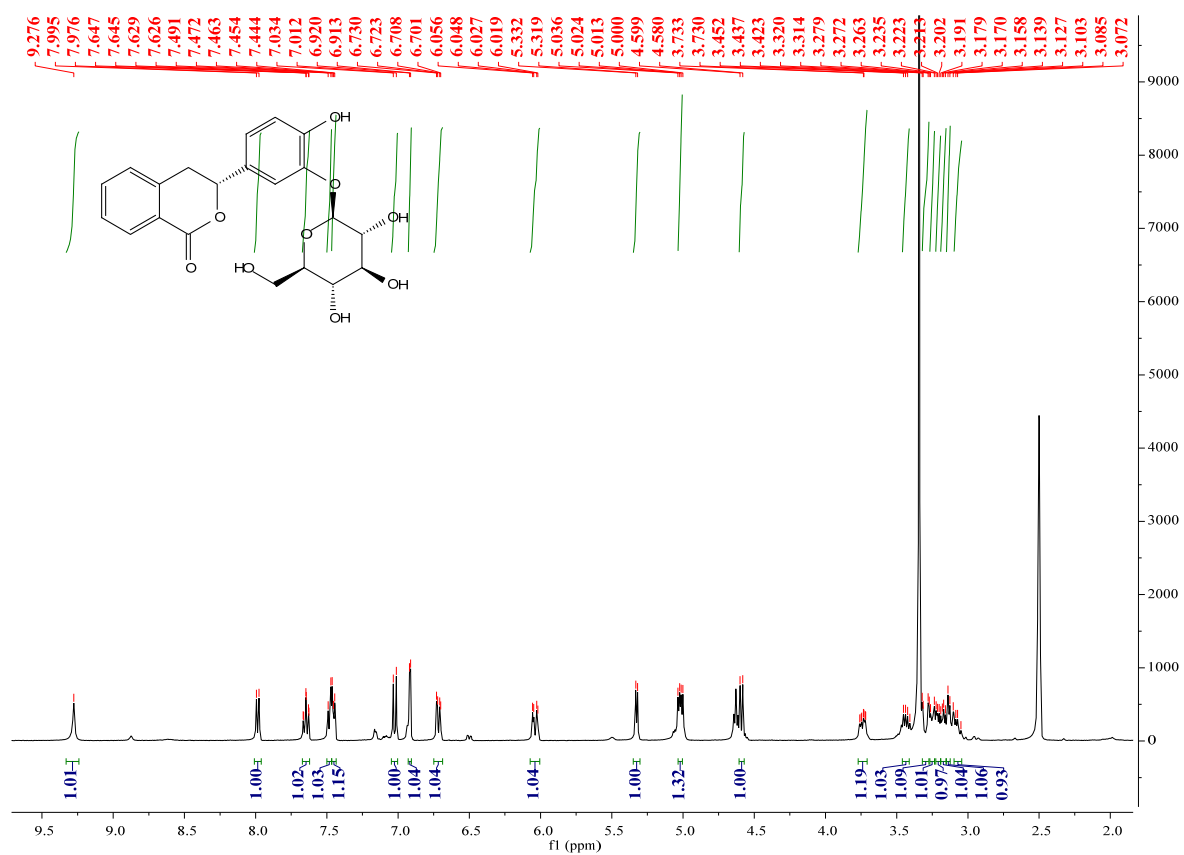

Figure S11. <sup>1</sup>H NMR spectrum of compound 3 in DMSO-*d*<sub>6</sub>.

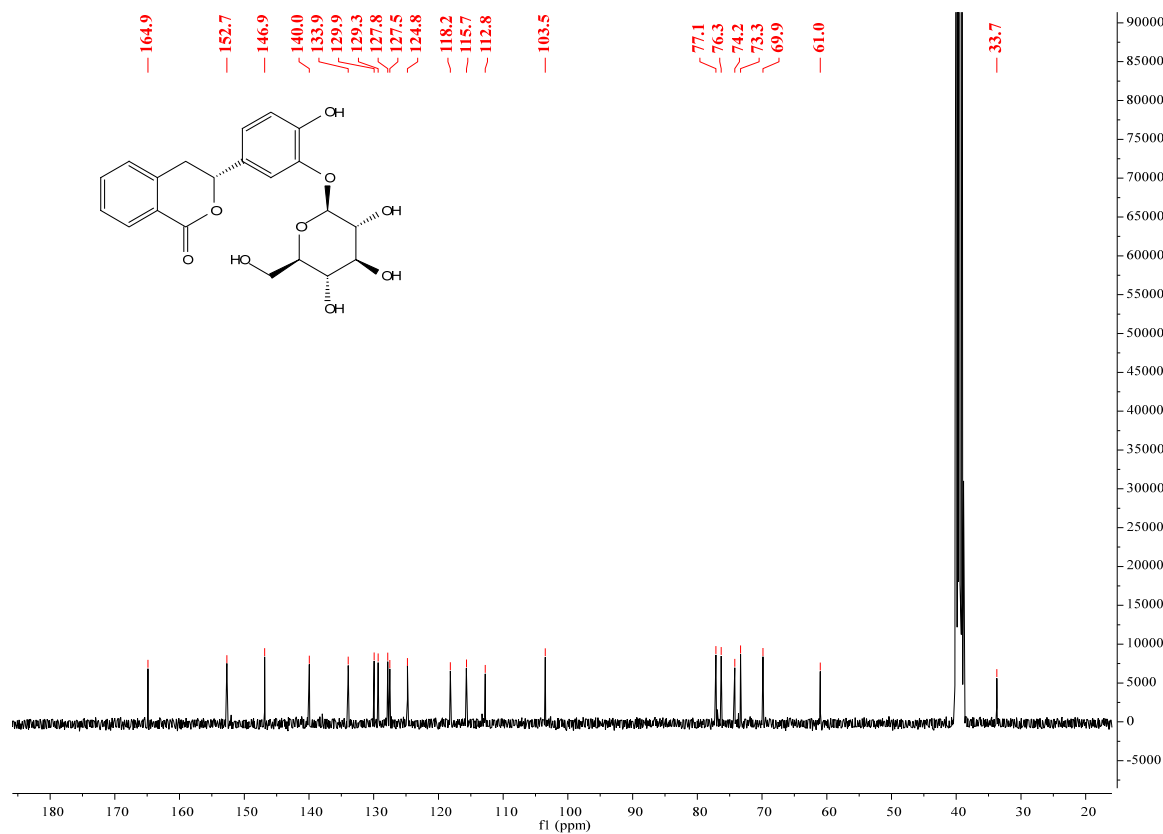

Figure S12. <sup>13</sup>C NMR spectrum of compound 3 in DMSO-*d*<sub>6</sub>.



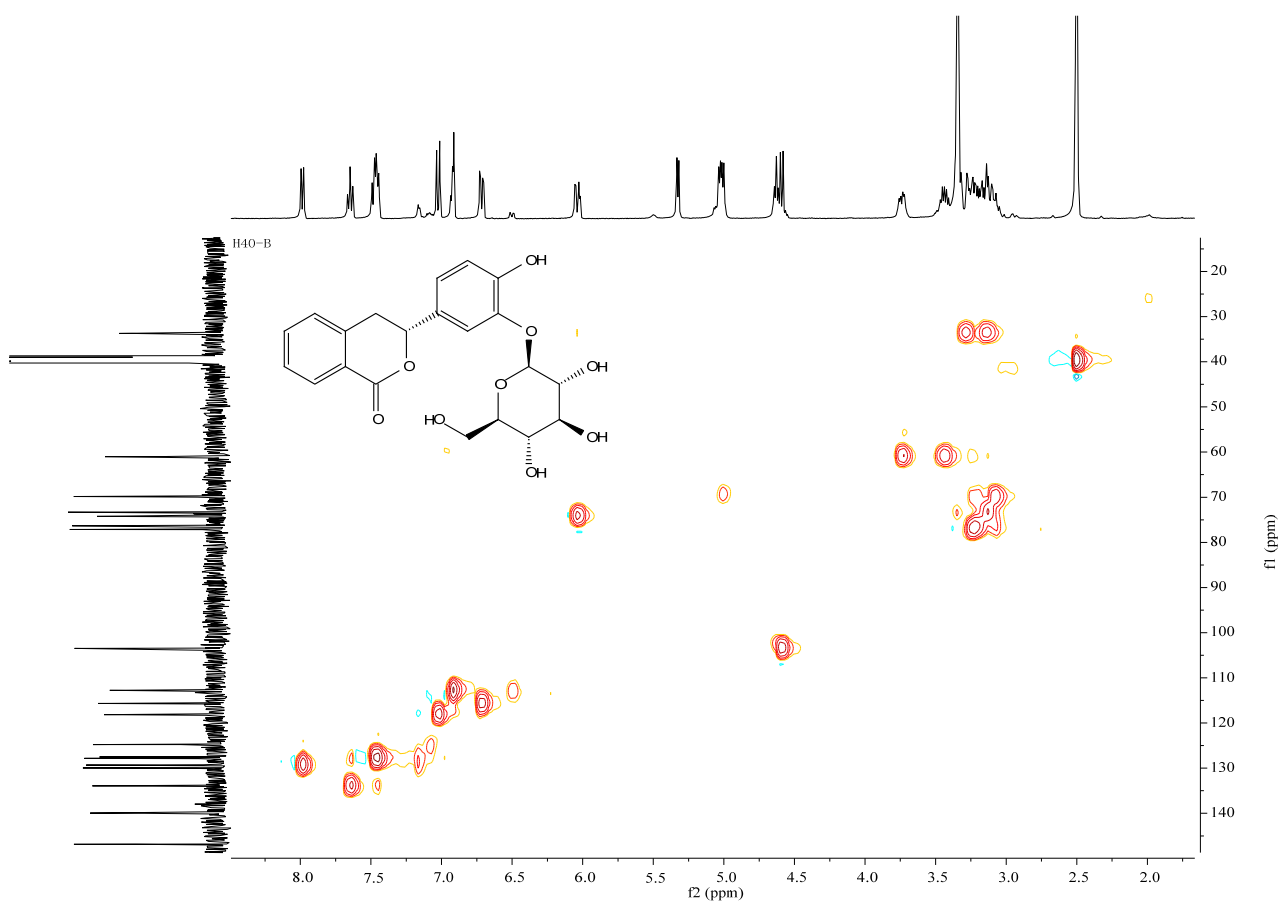

**Figure S13.** HSQC spectrum of compound **3** in DMSO- $d_6$ .

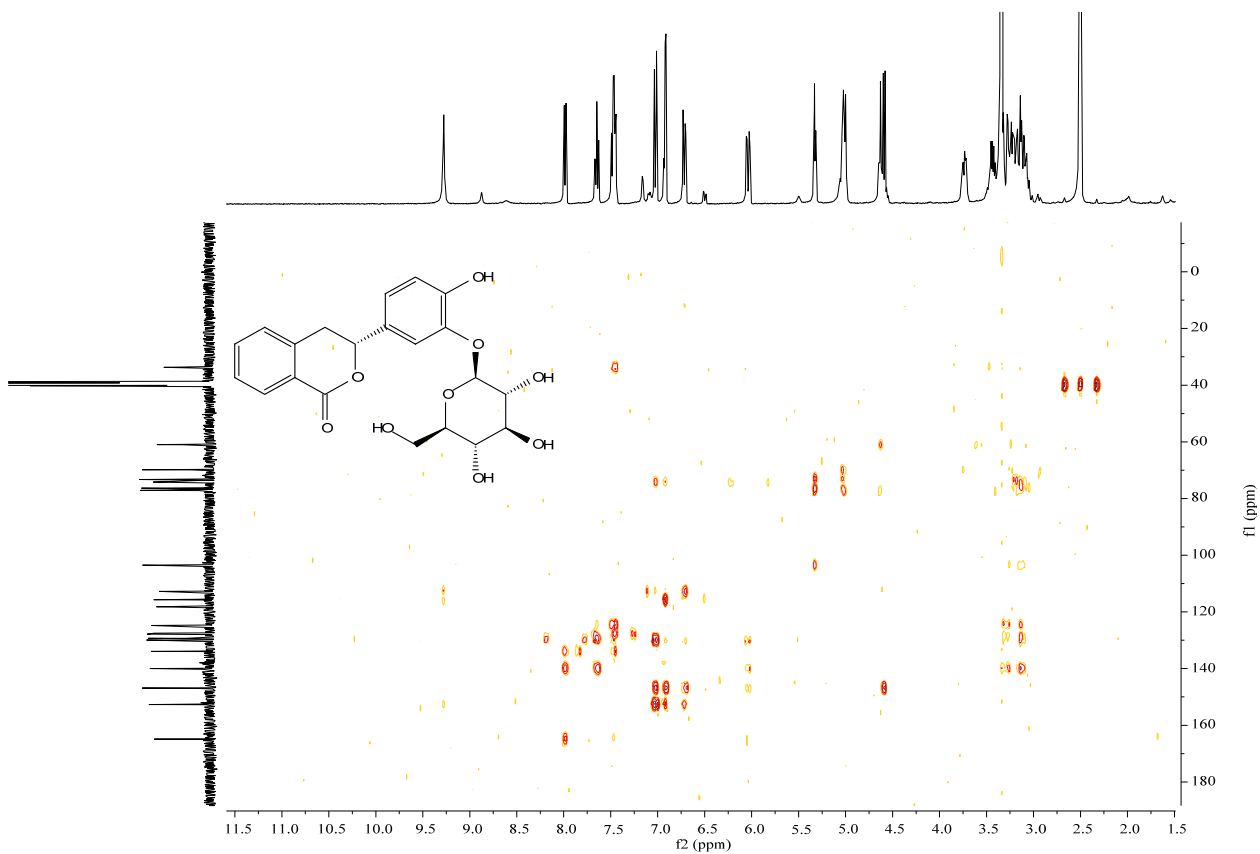

**Figure S14.** HMBC spectrum of compound **3** in DMSO- $d_6$ .

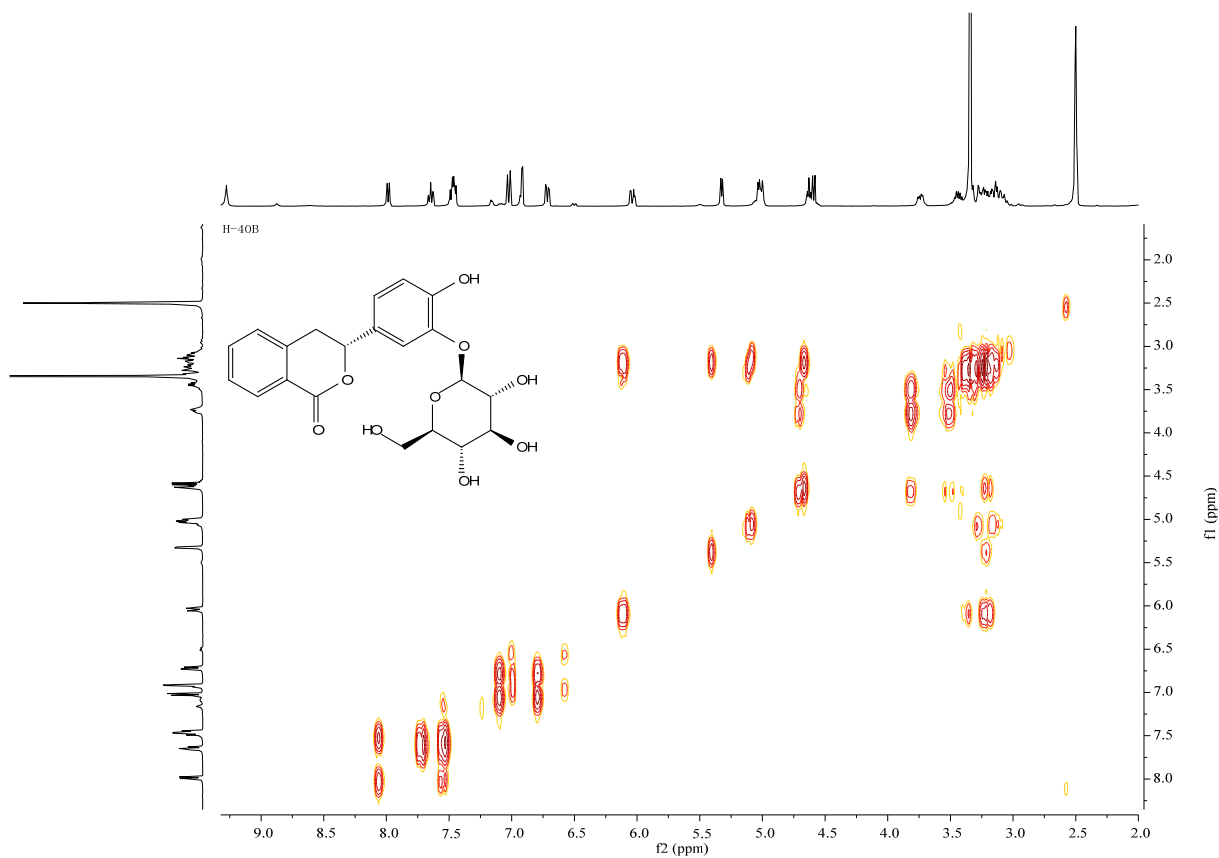

Figure S15.  $^1\text{H}$ - $^1\text{H}$  COSY spectrum of compound **3** in  $\text{DMSO}-d_6$ .

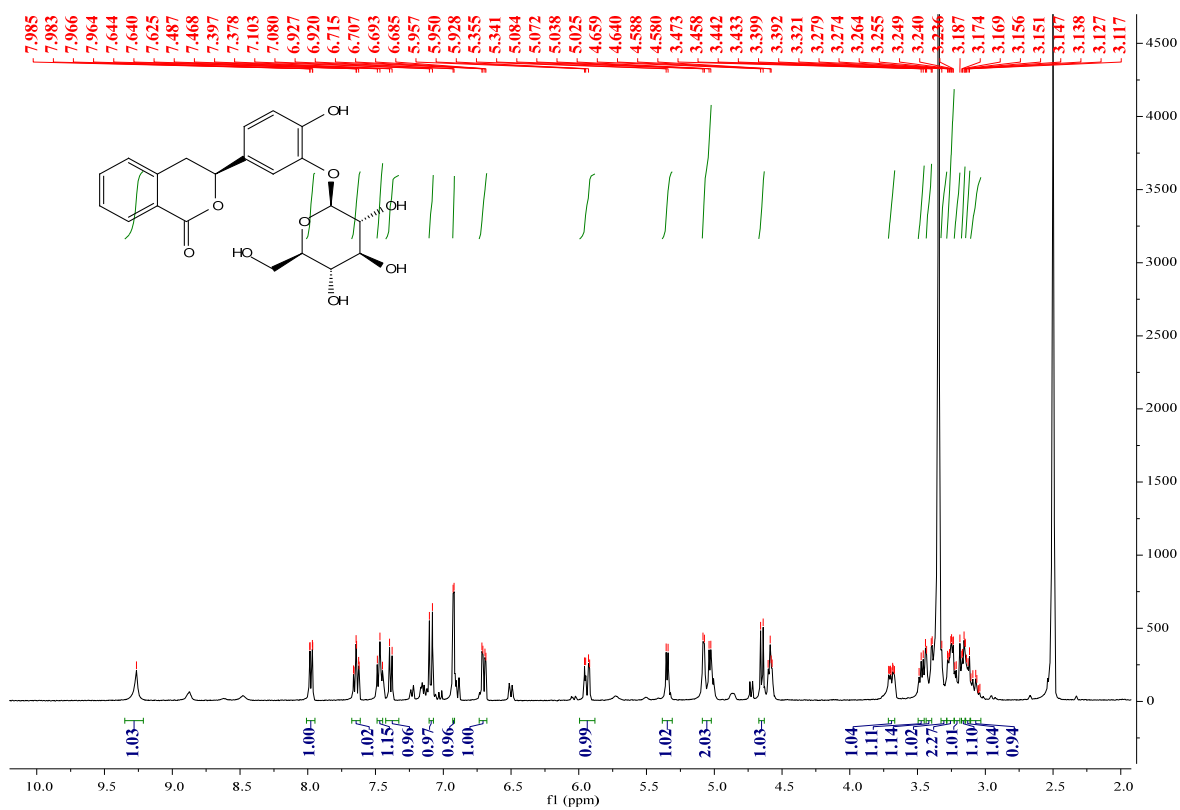

Figure S16.  $^1\text{H}$  NMR spectrum of compound **4** in  $\text{DMSO}-d_6$ .

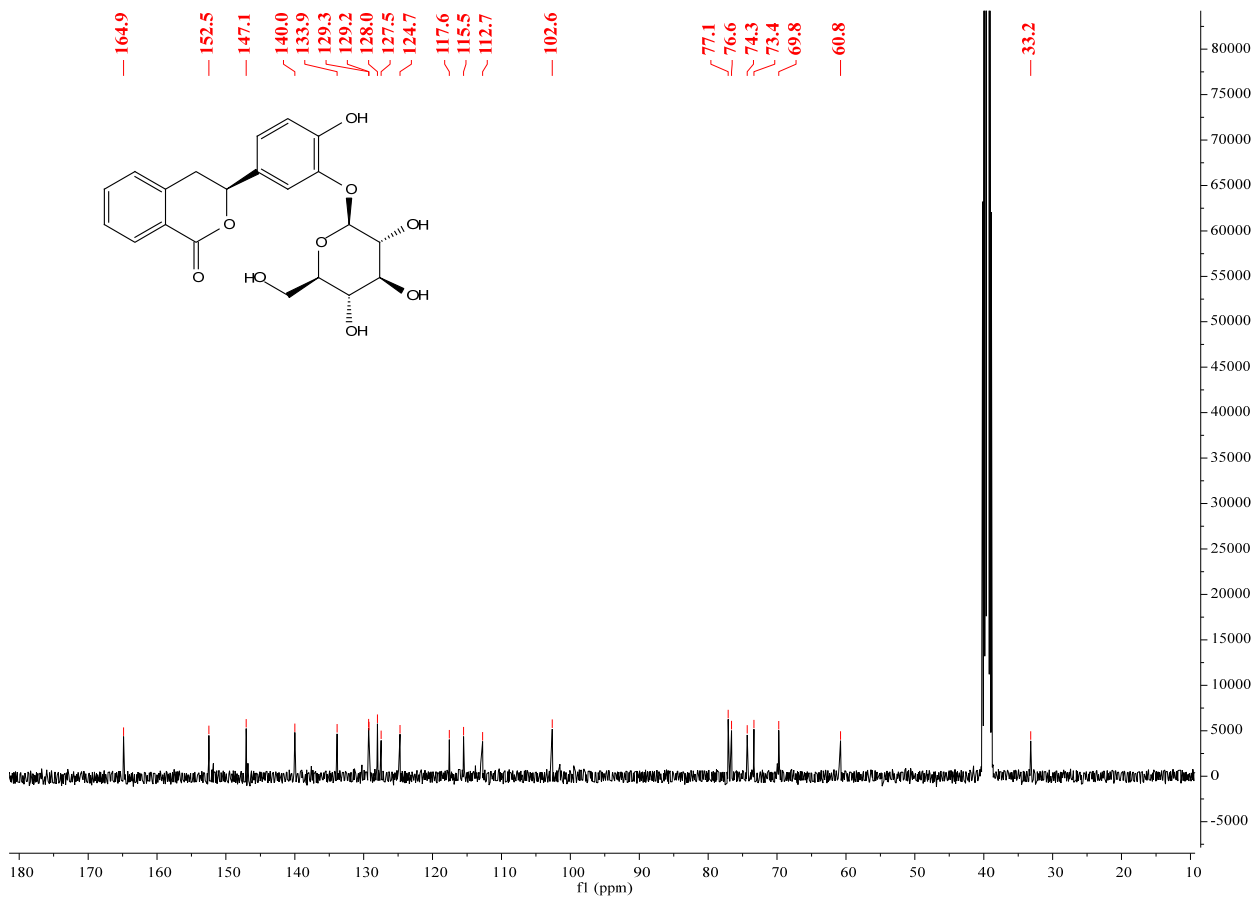

**Figure S17.**  $^{13}\text{C}$  NMR spectrum of compound 4 in  $\text{DMSO-}d_6$ .

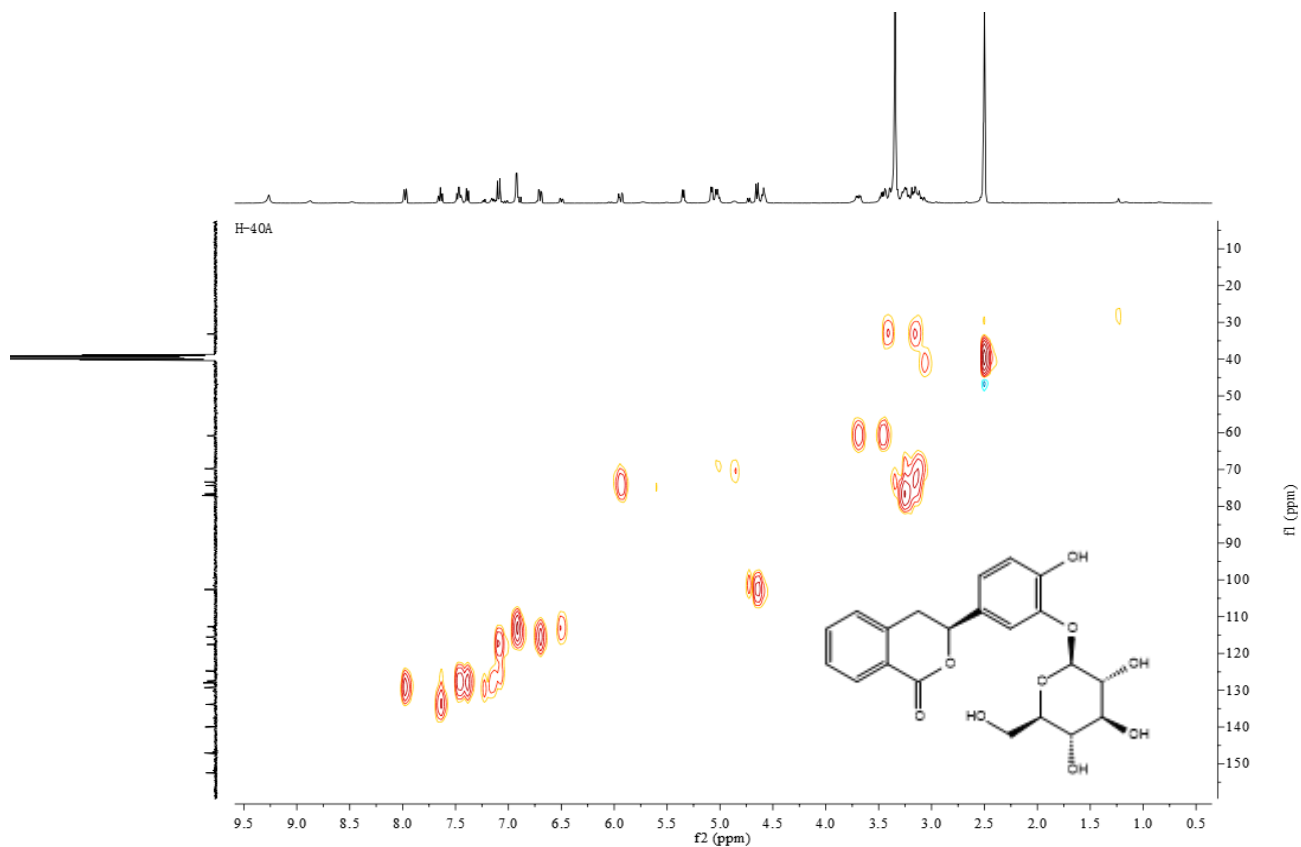

**Figure S18.** HSQC spectrum of compound 4 in  $\text{DMSO-}d_6$ .

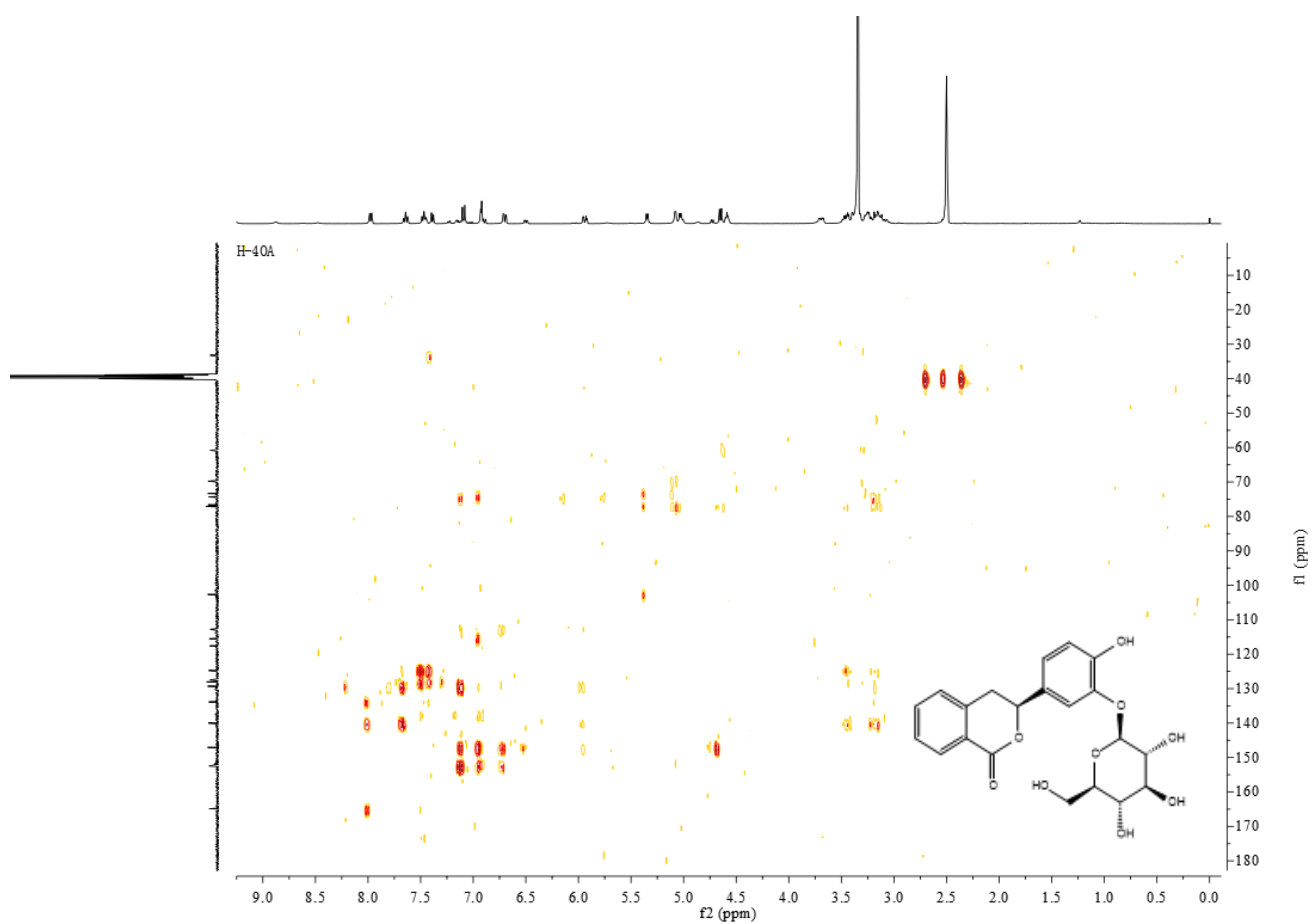

**Figure S19.** HMBC spectrum of compound 4 in DMSO- $d_6$ .

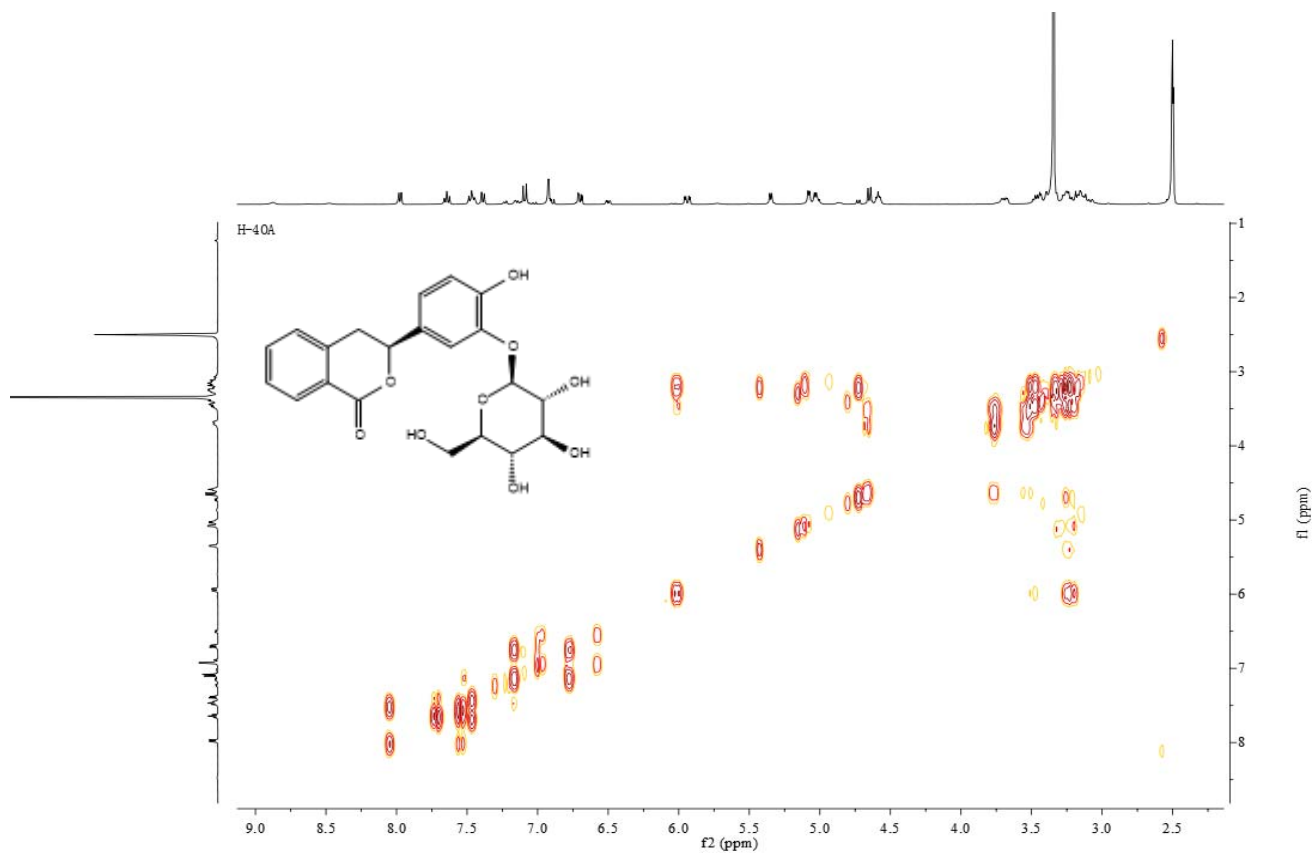

**Figure S20.**  $^1\text{H}$ - $^1\text{H}$  COSY spectrum of compound 4 in DMSO- $d_6$ .
